# Supplementary material for: Metal-free polycycloaddition of aldehyde-activated internal diynes and diazides toward post-functionalizable poly(formyl-1,2,3-triazole)s
Source: Royal Society of Chemistry journal article supplement (doi:10.1039/d0py00193g), 2020-01-01
Supplement: d0py00193g1.pdf [file d0py00193g1.pdf]

## Electronic Supplementary Information (ESI)

Metal-free polycycloaddition of aldehyde-activated internal diynes and diazides toward post-functionalizable poly(formyl-1,2,3-triazole)s

Baixue Li,<sup>†</sup> Anjun Qin<sup>\*,†</sup> and Ben Zhong Tang<sup>\*,†,‡</sup>

<sup>†</sup>State Key Laboratory of Luminescent Materials and Devices, Guangdong Provincial Key Laboratory of Luminescence from Molecular Aggregates, Center for Aggregation-Induced Emission, South China University of Technology, Guangzhou 510640, China.

<sup>‡</sup>Department of Chemistry, Hong Kong Branch of Chinese National Engineering Research Center for Tissue Restoration and Reconstruction, Institute for Advanced Study, and Department of Chemical and Biological Engineering, The Hong Kong University of Science & Technology, Clear Water Bay, Kowloon, Hong Kong, China.

## Table of Content

|                                                                                                                                                                                                     |     |
|-----------------------------------------------------------------------------------------------------------------------------------------------------------------------------------------------------|-----|
| Monomer synthesis.                                                                                                                                                                                  | S4  |
| Post-modification model reactions.                                                                                                                                                                  | S5  |
| <b>Scheme S1</b> Synthesis of <b>1a-1b</b> .                                                                                                                                                        | S5  |
| <b>Scheme S2</b> Synthesis of <b>2a-2d</b> .                                                                                                                                                        | S5  |
| <b>Scheme S3</b> Synthesis of <b>3-A</b> and <b>3-B</b> .                                                                                                                                           | S6  |
| <b>Scheme S4</b> Synthesis of <b>6-A</b> and <b>6-B</b> .                                                                                                                                           | S6  |
| <b>Scheme S5</b> Synthesis of <i>cis-7</i> and <i>trans-7</i> .                                                                                                                                     | S6  |
| <b>Table S1</b> Effect of solvent on the polymerization of <b>1a</b> and <b>2a</b> .                                                                                                                | S6  |
| <b>Table S2</b> Effect of reaction temperature on the polymerization of <b>1a</b> and <b>2a</b> .                                                                                                   | S7  |
| <b>Table S3</b> Time course of the polymerization of <b>1a</b> and <b>2a</b> .                                                                                                                      | S7  |
| <b>Table S4</b> Effect of monomer concentration on the polymerization of <b>1a</b> and <b>2a</b> .                                                                                                  | S7  |
| <b>Table S5</b> Crystal data and structure refinement of model compound <b>3-B</b> .                                                                                                                | S8  |
| <b>Table S6</b> Crystal data and structure refinement of model compound <i>cis-7</i> .                                                                                                              | S9  |
| <b>Table S7</b> Crystal data and structure refinement of model compound <i>trans-7</i> .                                                                                                            | S10 |
| <b>Fig. S1</b> TGA (A) and DSC (B) curves of <b>P1a2a-P1b2a</b> at a heating rate of 20 °C min <sup>-1</sup> under nitrogen. $T_d$ presents temperature of 5% weight loss.                          | S11 |
| <b>Fig. S2</b> FT-IR spectra of <b>2b</b> (A), <b>1a</b> (B) and <b>P1a2b</b> (C).                                                                                                                  | S11 |
| <b>Fig. S3</b> FT-IR spectra of <b>2c</b> (A), <b>1a</b> (B) and <b>P1a2c</b> (C).                                                                                                                  | S12 |
| <b>Fig. S4</b> FT-IR spectra of <b>2d</b> (A), <b>1a</b> (B) and <b>P1a2d</b> (C).                                                                                                                  | S12 |
| <b>Fig. S5</b> FT-IR spectra of <b>2a</b> (A), <b>1b</b> (B) and <b>P1b2a</b> (C).                                                                                                                  | S13 |
| <b>Fig. S6</b> <sup>13</sup> C NMR spectra of <b>1a</b> (A), <b>2a</b> (B), <b>3-A</b> (C), <b>3-B</b> (D) and <b>P1a2a</b> (E) in CDCl <sub>3</sub> . The solvent peaks are marked with asterisks. | S14 |
| <b>Fig. S7</b> <sup>1</sup> H NMR spectra of <b>1a</b> (A), <b>2b</b> (B) and <b>P1a2b</b> (C) in CDCl <sub>3</sub> . The solvent peaks are marked with asterisks.                                  | S15 |
| <b>Fig. S8</b> <sup>1</sup> H NMR spectra of <b>1a</b> (A), <b>2c</b> (B) and <b>P1a2c</b> (C) in CDCl <sub>3</sub> . The solvent peaks are marked with asterisks.                                  | S16 |
| <b>Fig. S9</b> <sup>1</sup> H NMR spectra of <b>1a</b> (A), <b>2d</b> (B) and <b>P1a2d</b> (C) in CDCl <sub>3</sub> . The solvent peaks are marked with asterisks.                                  | S17 |
| <b>Fig. S10</b> <sup>1</sup> H NMR spectra of <b>1b</b> (A), <b>2a</b> (B) and <b>P1b2a</b> (C) in CDCl <sub>3</sub> . The solvent peaks are marked with asterisks.                                 | S18 |
| <b>Fig. S11</b> <sup>13</sup> C NMR spectra of <b>1a</b> (A), <b>2b</b> (B) and <b>P1a2b</b> (C) in CDCl <sub>3</sub> . The solvent peaks are marked with asterisks.                                | S19 |

**Fig. S12**  $^{13}\text{C}$  NMR spectra of **1a** (A), **2c** (B) and **P1a2c** (C) in  $\text{CDCl}_3$ . The solvent peaks are marked with asterisks. S20

**Fig. S13**  $^{13}\text{C}$  NMR spectra of **1a** (A), **2d** (B) and **P1a2d** (C) in  $\text{CDCl}_3$ . The solvent peaks are marked with asterisks. S21

**Fig. S14**  $^{13}\text{C}$  NMR spectra of **1b** (A), **2a** (B) and **P1b2a** (C) in  $\text{CDCl}_3$ . The solvent peaks are marked with asterisks. S22

**Fig. S15** The in situ IR spectra of the polymerization solution of **1a** and **2a** at  $150\text{ }^\circ\text{C}$  within 3 h. S23

**Fig. S16** PL spectra of **P1a2d** in THF and THF/water mixtures with different water fractions. Concentrations:  $10^{-5}\text{ M}$ ,  $\lambda_{\text{ex}} = 323\text{ nm}$ . Inset: photograph taken under illumination of hand-held UV lamp. S23

**Fig. S17** Changes of PL spectrum (A) and the plot of normalized changes in PL intensity ( $1-I/I_0$ ) of **P1a2a** treated with hydrazine in THF solutions. S23

**Fig. S18**  $^1\text{H}$  NMR spectra of **P1a2a** (A), **6-B** (B), **6-A** (C) and **PPM1** (D) in  $\text{CDCl}_3$ . The solvent peaks are marked with asterisks. S24

**Fig. S19**  $^1\text{H}$  NMR spectra of **P1a2a** (A), **6-B** (B), **6-A** (C) and **PPM2** (D) in  $\text{CDCl}_3$ . The solvent peaks are marked with asterisks. S25

**Fig. S20**  $^1\text{H}$  NMR spectra of **P1a2a** (A), *trans-7* (B), *cis-7* (C) and **PPM3** (D) in  $\text{CDCl}_3$ . The solvent peaks are marked with asterisks. S26

**Fig. S21** TGA (A) and DSC (B) curves of **P1a2a** and its derivatives at a heating rate of  $20\text{ }^\circ\text{C min}^{-1}$  under nitrogen.  $T_d$  presents temperature of 5% weight loss. S27

**Fig. S22** UV-vis absorption spectra (A) and PL spectra (B) of **P1a2a** and **PPM3** in THF solutions. Concentrations:  $10^{-5}\text{ M}$ ,  $\lambda_{\text{ex}} = 323\text{ nm}$ . Inset: photographs of **P1a2a** and **PPM3** powders (A) and their THF solutions (B) taken under daylight and UV illumination. S27

**References** S28

**Monomer synthesis.** The aldehyde-activated internal diynes, named 3,3'-(9,9-dibutyl-9H-fluorene-2,7-diyl)dipropiolaldehyde (**1a**) and 3,3'-(9,9-dimethyl-9H-fluorene-2,7-diyl)dipropiolaldehyde (**1b**) were prepared according to the published procedures.<sup>1,2</sup> The azides monomers, 1,4-bis((6-azidohexyl)oxy)benzene (**2a**), 1,2-bis(4-(azidomethyl)phenyl)-1,2-diphenylethene (**2b**), bis(4-azidophenyl)methane (**2c**) and 1,2-bis(4-((6-azidohexyl)oxy)phenyl)-1,2-diphenylethene (**2d**) were prepared according to the previous reports.<sup>3-6</sup> The detailed synthetic routes are shown in Schemes S1 and S2.

**3,3'-(9,9-Dibutyl-9H-fluorene-2,7-diyl)dipropiolaldehyde (1a):** <sup>1</sup>H NMR (500 MHz, CDCl<sub>3</sub>),  $\delta$  (TMS, ppm): 9.46, 7.77, 7.75, 7.64, 7.61, 1.99, 1.10, 0.68, 0.55. <sup>13</sup>C NMR (125 MHz, CDCl<sub>3</sub>),  $\delta$  (TMS, ppm): 176.77, 151.89, 142.97, 132.92, 128.08, 121.03, 118.98, 96.01, 89.39, 55.62, 39.98, 26.04, 23.05, 13.90.

**3,3'-(9,9-Dimethyl-9H-fluorene-2,7-diyl)dipropiolaldehyde (1b):** <sup>1</sup>H NMR (500 MHz, CDCl<sub>3</sub>),  $\delta$  (TMS, ppm): 9.45, 7.78, 7.76, 7.70, 7.65, 7.63, 1.51. <sup>13</sup>C NMR (125 MHz, CDCl<sub>3</sub>),  $\delta$  (TMS, ppm): 176.74, 154.58, 141.11, 133.06, 128.05, 121.28, 119.16, 95.75, 89.33, 47.34, 26.84.

**1,4-Bis((6-azidohexyl)oxy)benzene (2a):** <sup>1</sup>H NMR (500 MHz, CDCl<sub>3</sub>),  $\delta$  (TMS, ppm): 6.81, 3.90, 3.27, 1.77, 1.62, 1.46. <sup>13</sup>C NMR (125 MHz, CDCl<sub>3</sub>),  $\delta$  (TMS, ppm): 153.23, 115.30, 68.36, 51.37, 29.32, 28.77, 26.63, 25.77.

**1,2-Bis(4-(azidomethyl)phenyl)-1,2-diphenylethene (2b):** <sup>1</sup>H NMR (500 MHz, CDCl<sub>3</sub>),  $\delta$  (TMS, ppm): 7.11, 7.03, 4.26. <sup>13</sup>C NMR (125 MHz, CDCl<sub>3</sub>),  $\delta$  (TMS, ppm): 143.77, 143.26, 140.81, 133.53, 131.83, 131.24, 128.02, 126.83, 54.62.

**Bis(4-azidophenyl)methane (2c):** <sup>1</sup>H NMR (500 MHz, CDCl<sub>3</sub>),  $\delta$  (TMS, ppm): 7.14, 6.96, 3.92. <sup>13</sup>C NMR (125 MHz, CDCl<sub>3</sub>),  $\delta$  (TMS, ppm): 138.26, 137.76, 130.22, 119.47, 40.82.

**1,2-Bis(4-((6-azidohexyl)oxy)phenyl)-1,2-diphenylethene (2d):** <sup>1</sup>H NMR (500 MHz, CDCl<sub>3</sub>),  $\delta$  (TMS, ppm): 7.12-7.00, 6.94-6.89, 6.65-6.60, 3.90-3.86, 3.29-3.26, 1.78-1.73, 1.66-1.60, 1.50-1.43. <sup>13</sup>C NMR (125 MHz, CDCl<sub>3</sub>),  $\delta$  (TMS, ppm): 157.58, 144.41, 139.77, 136.43, 132.64, 131.54, 127.68, 126.28, 113.66, 67.63, 51.54, 31.08, 29.31, 28.94, 26.68, 25.87.

**Post-modification model reactions.** Compounds **6-A/6-B** and *cis*-**7/trans**-**7** were prepared according to the published procedures.<sup>7,8</sup> The detailed synthetic routes are shown in Scheme S4 and S5.

**6-A:** <sup>1</sup>H NMR (500 MHz, CDCl<sub>3</sub>), δ (TMS, ppm): 8.43, 7.49-6.61, 5.51, 2.57, 2.49, 1.56, 1.29, 1.25, 0.87.

**6-B:** <sup>1</sup>H NMR (500 MHz, CDCl<sub>3</sub>), δ (TMS, ppm): 8.51, 7.69-6.64, 6.17, 2.62, 2.49, 1.62, 1.26, 0.88.

*cis*-**7:** <sup>1</sup>H NMR (500 MHz, CDCl<sub>3</sub>), δ (TMS, ppm): 7.52-7.45, 7.27, 7.15-7.05, 6.76 (d, *J*=12 Hz, 1H), 5.41 (d, *J*=12 Hz, 1H).

*trans*-**7:** <sup>1</sup>H NMR (500 MHz, CDCl<sub>3</sub>), δ (TMS, ppm): 7.54-7.49, 7.28, 7.15-7.03, 6.28 (d, *J*=16 Hz, 1H).

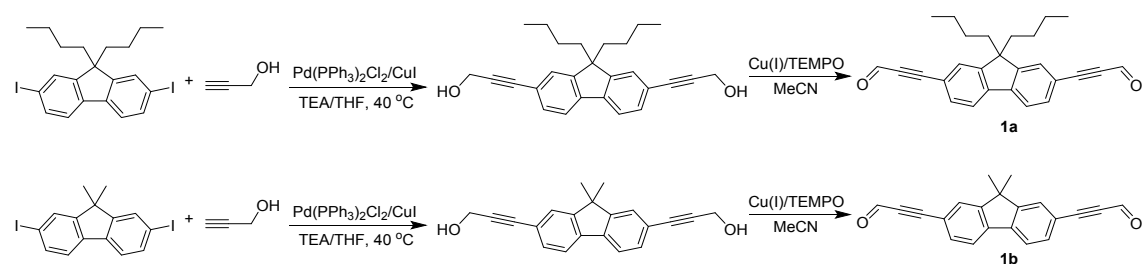

**Scheme S1** Synthesis of **1a** and **1b**.

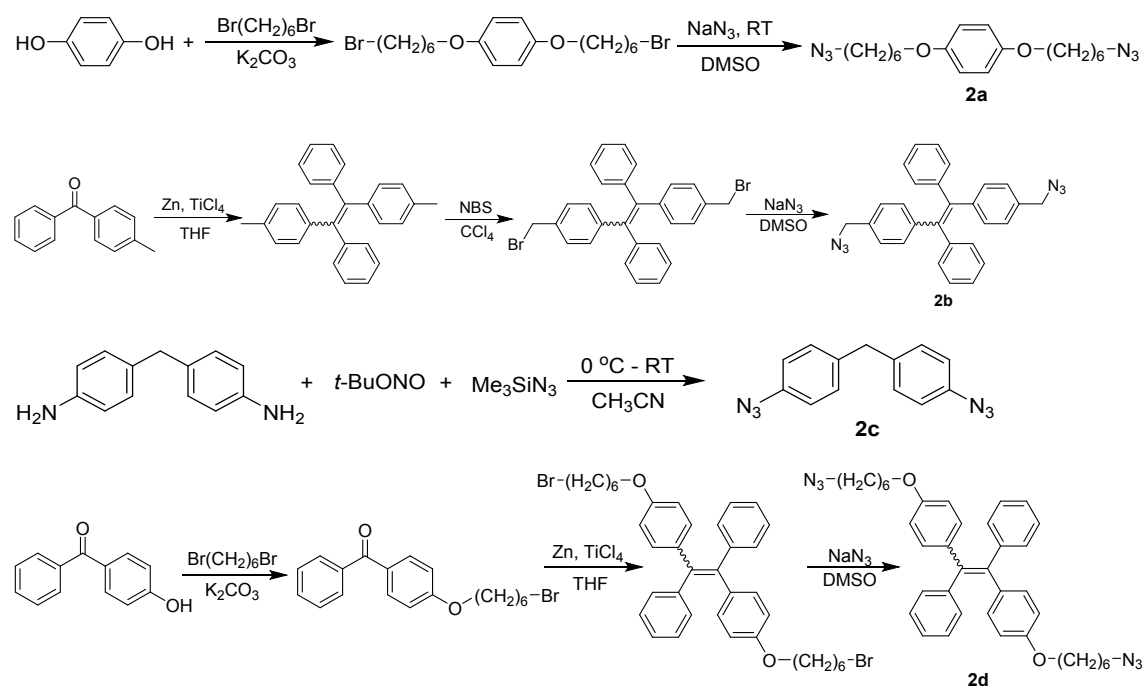

**Scheme S2** Synthesis of **2a-2d**.

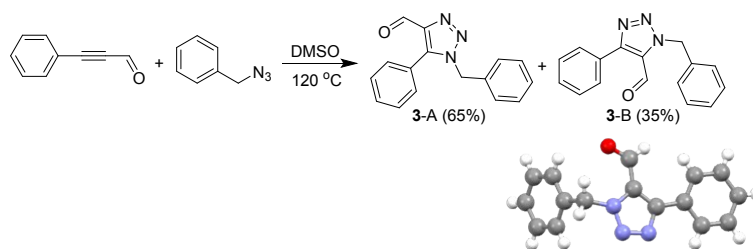

**Scheme S3** Synthesis of **3-A** and **3-B**.

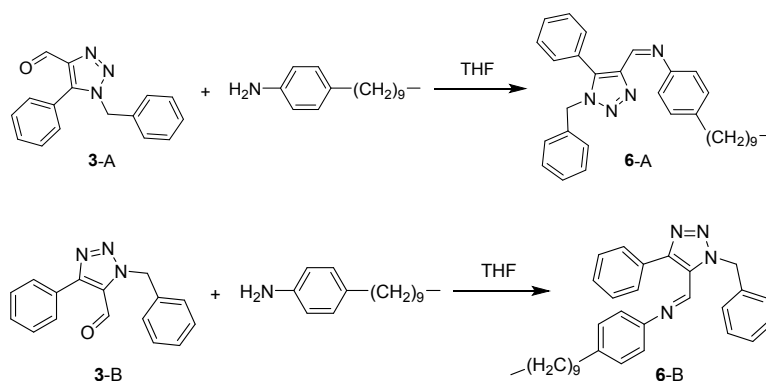

**Scheme S4** Synthesis of **6-A** and **6-B**.

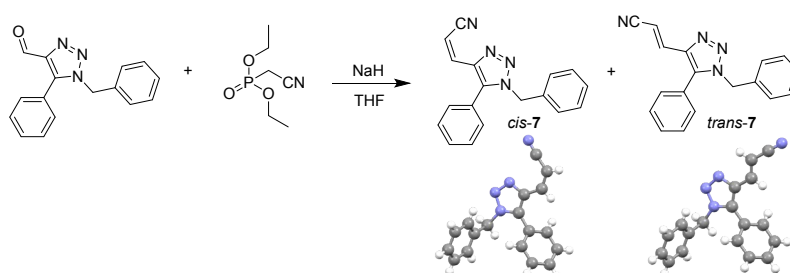

**Scheme S5** Synthesis of *cis*-**7** and *trans*-**7**.

**Table S1** Effect of solvent on the polymerization of **1a** and **2a**<sup>a</sup>

| entry | solvent     | yield (%) | $M_w^b$ | PDI <sup>b</sup> | $F_A^c$ (%) |
|-------|-------------|-----------|---------|------------------|-------------|
| 1     | DMSO        | 85        | 16 360  | 1.55             | 71          |
| 2     | DMF         | 80        | 14 580  | 1.48             | 68          |
| 3     | 1,4-dioxane | 79        | 12 950  | 1.41             | 64          |
| 4     | toluene     | 71        | 15 300  | 1.47             | 61          |

<sup>a</sup> Carried out at 120 °C for 3 h under nitrogen at a monomer concentration of 0.5 M,  $[1a] = [2a]$ . <sup>b</sup> Estimated by advanced polymer chromatography (APC) using THF as an eluent on the basis of a polystyrene (PS) calibration;  $M_w$  = weight-average molecular weight; polydispersity index (PDI) =  $M_w/M_n$ ;  $M_n$  = number-average molecular weight. <sup>c</sup> Fraction of structure A in the polymers determined by <sup>1</sup>H NMR.

**Table S2** Effect of reaction temperature on the polymerization of **1a** and **2a**<sup>a</sup>

| entry | <i>T</i> (°C) | yield (%) | <i>M</i> <sub>w</sub> <sup>b</sup> | PDI <sup>b</sup> |
|-------|---------------|-----------|------------------------------------|------------------|
| 1     | 80            | 52        | 4410                               | 1.22             |
| 2     | 100           | 63        | 11 090                             | 1.37             |
| 3     | 120           | 80        | 15 190                             | 1.48             |
| 4     | 140           | 87        | 43 350                             | 2.09             |
| 5     | 150           | 83        | 53 110                             | 2.55             |

<sup>a</sup> Carried out in DMSO for 3 h under nitrogen at a monomer concentration of 0.5 M, [1a] = [2a]. <sup>b</sup> Estimated by APC using THF as an eluent on the basis of a PS calibration; *M*<sub>w</sub> = weight-average molecular weight; PDI = *M*<sub>w</sub>/*M*<sub>n</sub>; *M*<sub>n</sub> = number-average molecular weight.

**Table S3** Time course of the polymerization of **1a** and **2a**<sup>a</sup>

| entry | <i>t</i> (h) | yield (%) | <i>M</i> <sub>w</sub> <sup>b</sup> | PDI <sup>b</sup> |
|-------|--------------|-----------|------------------------------------|------------------|
| 1     | 1.0          | 76        | 23 440                             | 1.71             |
| 2     | 1.5          | 88        | 48 920                             | 2.21             |
| 3     | 2.0          | 89        | 54 550                             | 2.29             |
| 4     | 3.0          | 90        | 58 690                             | 2.39             |

<sup>a</sup> Carried out in DMSO at 150 °C under nitrogen at a monomer concentration of 0.5 M, [1a] = [2a]. <sup>b</sup> Estimated by APC using THF as an eluent on the basis of a PS calibration; *M*<sub>w</sub> = weight-average molecular weight; PDI = *M*<sub>w</sub>/*M*<sub>n</sub>; *M*<sub>n</sub> = number-average molecular weight.

**Table S4** Effect of monomer concentration on the polymerization of **1a** and **2a**<sup>a</sup>

| entry          | <i>C</i> (M) | yield (%) | <i>M</i> <sub>w</sub> <sup>b</sup> | PDI <sup>b</sup> |
|----------------|--------------|-----------|------------------------------------|------------------|
| 1              | 0.10         | 75        | 9730                               | 1.33             |
| 2              | 0.20         | 80        | 18 470                             | 1.59             |
| 3              | 0.33         | 85        | 37 420                             | 1.94             |
| 4 <sup>c</sup> | 0.50         | 89        | 54 550                             | 2.29             |
| 5              | 1.00         | gelled    | -                                  | -                |

<sup>a</sup> Carried out in DMSO at 150 °C under nitrogen for 2 h, [1a] = [2a]. <sup>b</sup> Estimated by APC using THF as an eluent on the basis of a PS calibration; *M*<sub>w</sub> = weight-average molecular weight; PDI = *M*<sub>w</sub>/*M*<sub>n</sub>; *M*<sub>n</sub> = number-average molecular weight. <sup>c</sup> Data taken from Table S3, entry 3.

**Table S5** Crystal data and structure refinement of model compound **3-B**

|                                   |                                                  |
|-----------------------------------|--------------------------------------------------|
| Number                            | CCDC 1958959                                     |
| Empirical formula                 | C <sub>16</sub> H <sub>13</sub> N <sub>3</sub> O |
| Formula weight                    | 263.29                                           |
| Temperature                       | 120(10) K                                        |
| Wavelength                        | 1.54184 Å                                        |
| Crystal system                    | monoclinic                                       |
| Space group                       | P 1 21/c 1                                       |
| Unit cell dimensions              | a = 13.1254(7) Å    α = 90.00 °                  |
|                                   | b = 8.1029(4) Å    β = 109.249 °                 |
|                                   | c = 12.6860(7) Å    γ = 90.00 °                  |
| Volume                            | 1273.78(12) Å <sup>3</sup>                       |
| Z                                 | 4                                                |
| Density (calculated)              | 1.373 mg/m <sup>3</sup>                          |
| Absorption coefficient            | 0.713 mm <sup>-1</sup>                           |
| F(000)                            | 552                                              |
| Crystal size                      | 0.07 × 0.05 × 0.05 mm <sup>3</sup>               |
| Theta range for data collection   | 3.567 to 67.097 °                                |
| Index ranges                      | -15 ≤ h ≤ 14, -6 ≤ k ≤ 9, -14 ≤ l ≤ 15           |
| Reflections collections           | 5898                                             |
| Independent reflections           | 2269 [R(int) = 0.0240]                           |
| Completeness to theta = 66.97°    | 99.9%                                            |
| Absorption correction             | multi-scan                                       |
| Max. and min. transmission        | 1.00000 and 0.71569                              |
| Data / restraints / parameters    | 2269 / 0 / 181                                   |
| Goodness-of-fit on F <sup>2</sup> | 1.077                                            |
| Final R indices [I > 2σ(I)]       | R1 = 0.0437, wR2 = 0.1074                        |
| R indices (all data)              | R1 = 0.0450, wR2 = 0.1083                        |
| Largest diff. peak and hole       | 0.256 and -0.397 e.Å <sup>-3</sup>               |



**Table S6** Crystal data and structure refinement of model compound *cis-7*

|                                   |                                                |
|-----------------------------------|------------------------------------------------|
| Number                            | CCDC 1958962                                   |
| Empirical formula                 | C <sub>18</sub> H <sub>14</sub> N <sub>4</sub> |
| Formula weight                    | 286.33                                         |
| Temperature                       | 293(2) K                                       |
| Wavelength                        | 0.71073 Å                                      |
| Crystal system                    | triclinic                                      |
| Space group                       | P-1                                            |
| Unit cell dimensions              | a = 9.1045(15) Å    α = 110.846 °              |
|                                   | b = 9.4078(14) Å    β = 92.668 °               |
|                                   | c = 9.9658(17) Å    γ = 107.055 °              |
| Volume                            | 751.7(2) Å <sup>3</sup>                        |
| Z                                 | 2                                              |
| Density (calculated)              | 1.265 mg/m <sup>3</sup>                        |
| Absorption coefficient            | 0.078 mm <sup>-1</sup>                         |
| F(000)                            | 300                                            |
| Crystal size                      | 0.22 × 0.19 × 0.16 mm <sup>3</sup>             |
| Theta range for data collection   | 2.79 to 25.10 °                                |
| Index ranges                      | -10 ≤ h ≤ 10, -11 ≤ k ≤ 11, -11 ≤ l ≤ 11       |
| Reflections collections           | 10178                                          |
| Independent reflections           | 2573 [R(int) = 0.0586]                         |
| Completeness to theta = 25.10°    | 95.9%                                          |
| Absorption correction             | multi-scan                                     |
| Max. and min. transmission        | 0.9876 and 0.9830                              |
| Data / restraints / parameters    | 2573 / 0 / 199                                 |
| Goodness-of-fit on F <sup>2</sup> | 1.001                                          |
| Final R indices [I > 2σ(I)]       | R1 = 0.0679, wR2 = 0.1817                      |
| R indices (all data)              | R1 = 0.0944, wR2 = 0.1939                      |

**Table S7** Crystal data and structure refinement of model compound *trans-7*

|                                   |                                                |
|-----------------------------------|------------------------------------------------|
| Number                            | CCDC 1958961                                   |
| Empirical formula                 | C <sub>18</sub> H <sub>14</sub> N <sub>4</sub> |
| Formula weight                    | 286.33                                         |
| Temperature                       | 300(2) K                                       |
| Wavelength                        | 0.71073 Å                                      |
| Crystal system                    | monoclinic                                     |
| Space group                       | P2(1)/c                                        |
| Unit cell dimensions              | a = 11.0650(8) Å    α = 90.00 °                |
|                                   | b = 15.5926(12) Å    β = 108.433 °             |
|                                   | c = 9.3078(6) Å    γ = 90.00 °                 |
| Volume                            | 1523.50(19) Å <sup>3</sup>                     |
| Z                                 | 4                                              |
| Density (calculated)              | 1.248 mg/m <sup>3</sup>                        |
| Absorption coefficient            | 0.077 mm <sup>-1</sup>                         |
| F(000)                            | 600                                            |
| Crystal size                      | 0.24 × 0.18 × 0.15 mm <sup>3</sup>             |
| Theta range for data collection   | 2.61 to 26.00 °                                |
| Index ranges                      | -13 ≤ h ≤ 13, -19 ≤ k ≤ 19, -11 ≤ l ≤ 11       |
| Reflections collections           | 18156                                          |
| Independent reflections           | 2989 [R(int) = 0.0540]                         |
| Completeness to theta = 26.00°    | 99.5%                                          |
| Absorption correction             | multi-scan                                     |
| Max. and min. transmission        | 0.9885 and 0.9817                              |
| Data / restraints / parameters    | 2989 / 0 / 199                                 |
| Goodness-of-fit on F <sup>2</sup> | 1.005                                          |
| Final R indices [I > 2σ(I)]       | R1 = 0.0537, wR2 = 0.1403                      |
| R indices (all data)              | R1 = 0.0821, wR2 = 0.1721                      |

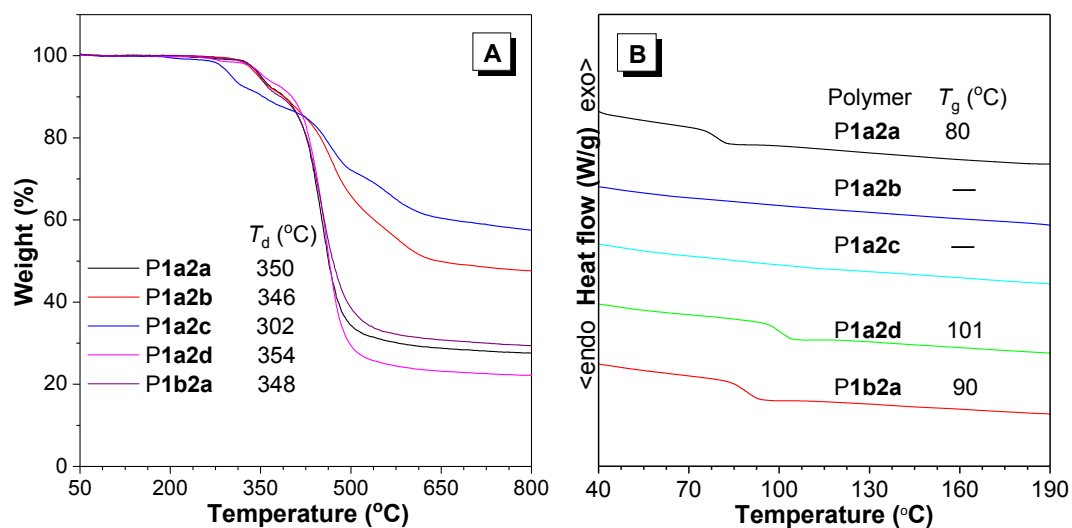

**Fig. S1** TGA (A) and DSC (B) curves of P1a2a-P1b2a at a heating rate of 20 °C min<sup>-1</sup> under nitrogen.  $T_d$  presents temperature of 5% weight loss.

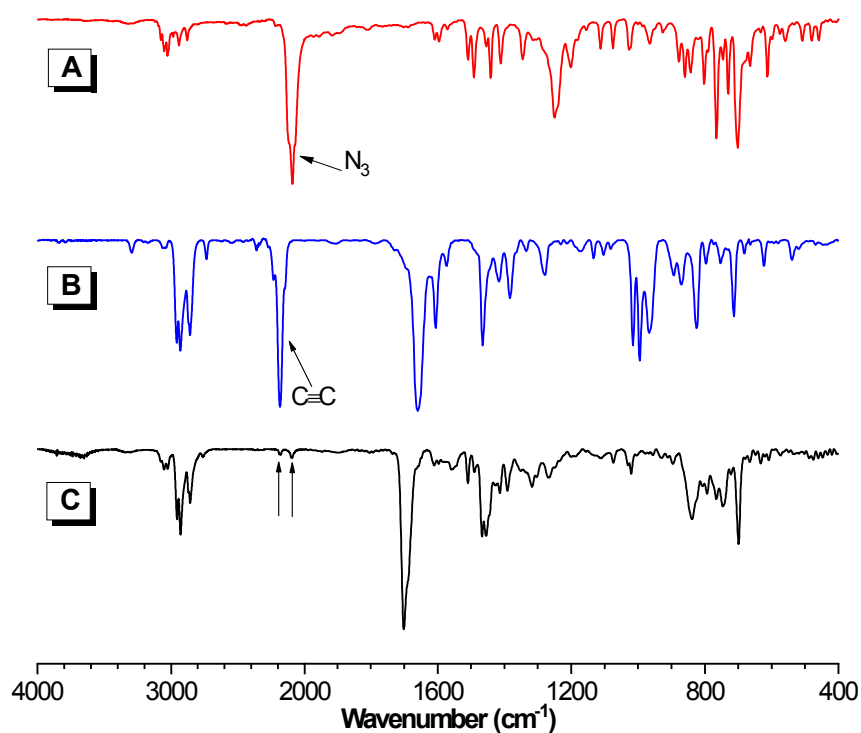

**Fig. S2** FT-IR spectra of 2b (A), 1a (B) and P1a2b (C).

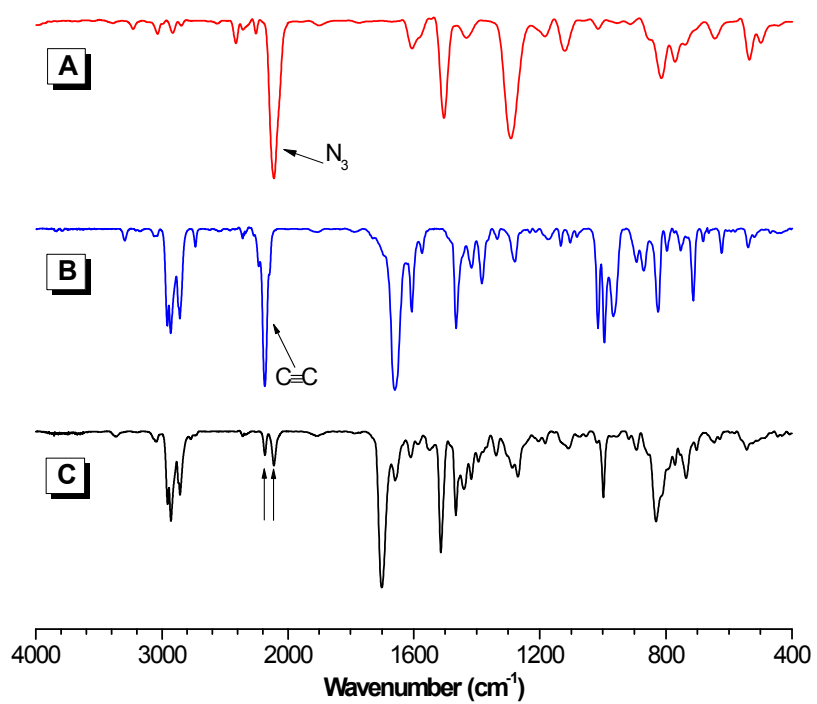

Fig. S3 FT-IR spectra of **2c** (A), **1a** (B) and **P1a2c** (C).

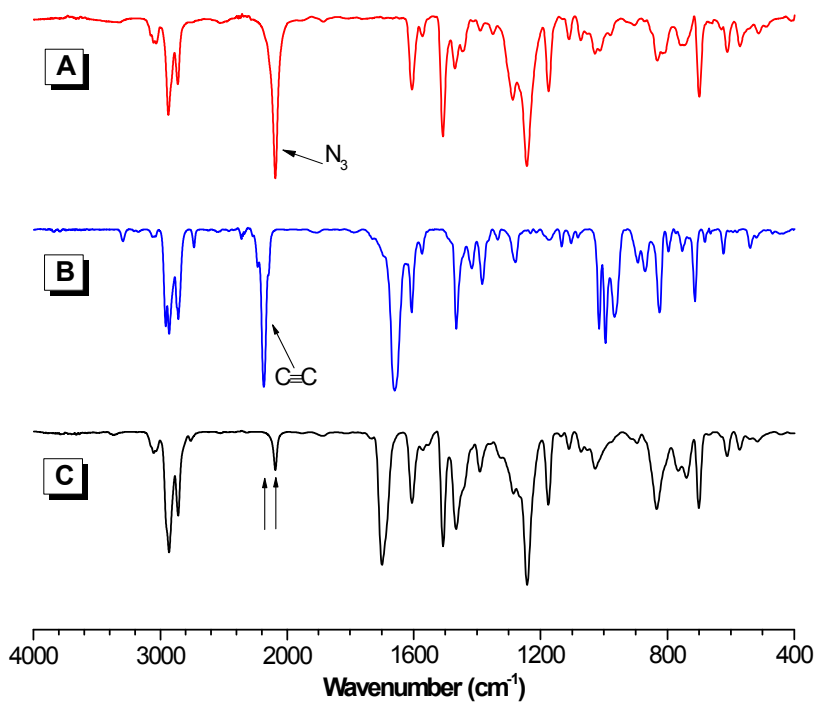

Fig. S4 FT-IR spectra of **2d** (A), **1a** (B) and **P1a2d** (C).

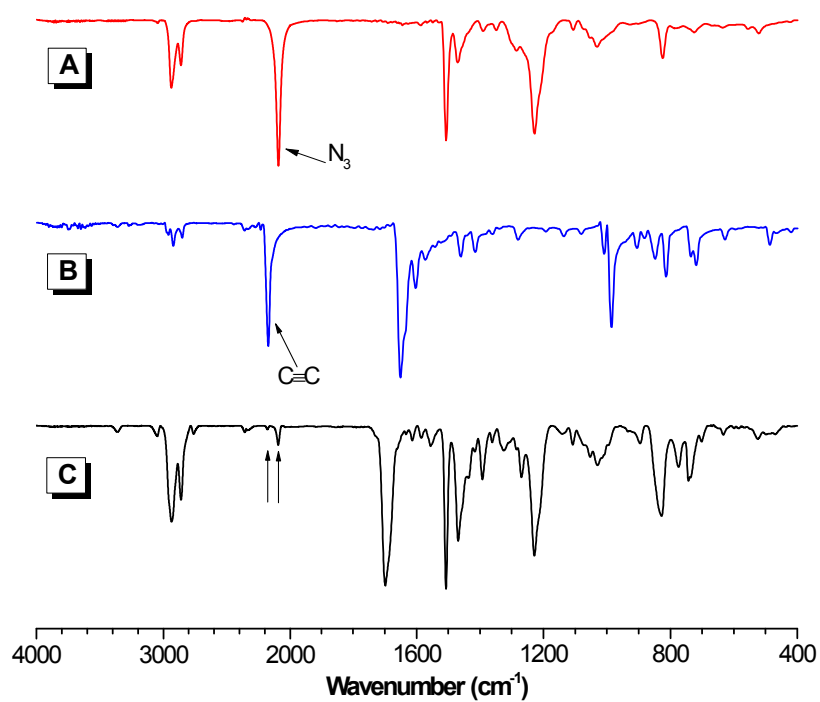

**Fig. S5** FT-IR spectra of **2a** (A), **1b** (B) and **P1b2a** (C).

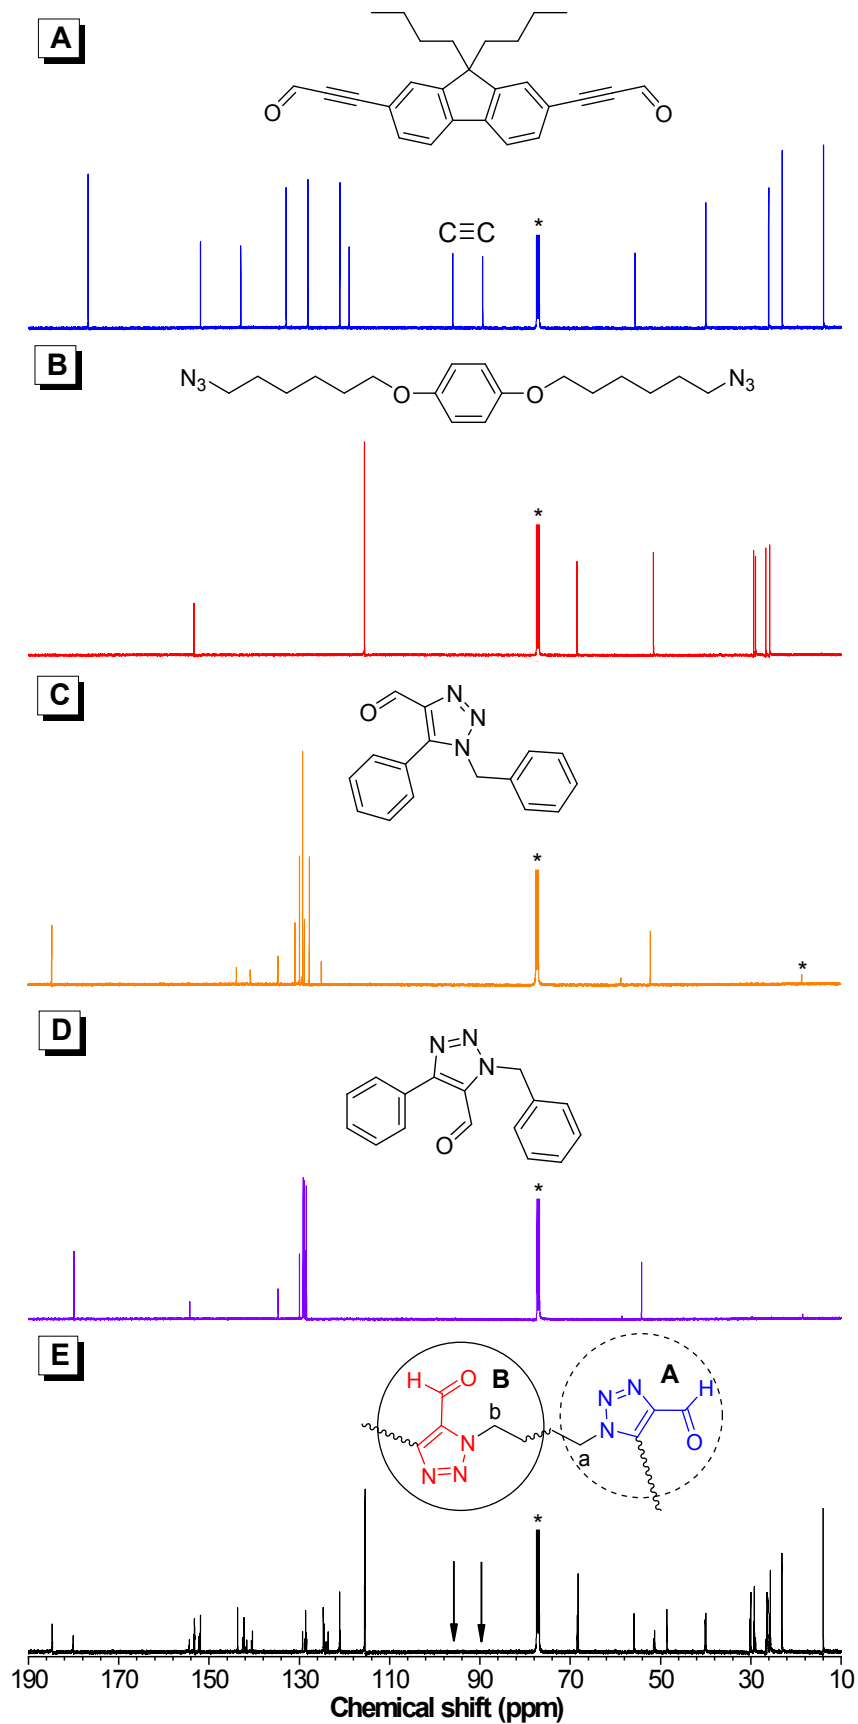

**Fig. S6**  $^{13}\text{C}$  NMR spectra of **1a** (A), **2a** (B), **3-A** (C), **3-B** (D) and **P1a2a** (E) in  $\text{CDCl}_3$ . The solvent peaks are marked with asterisks.

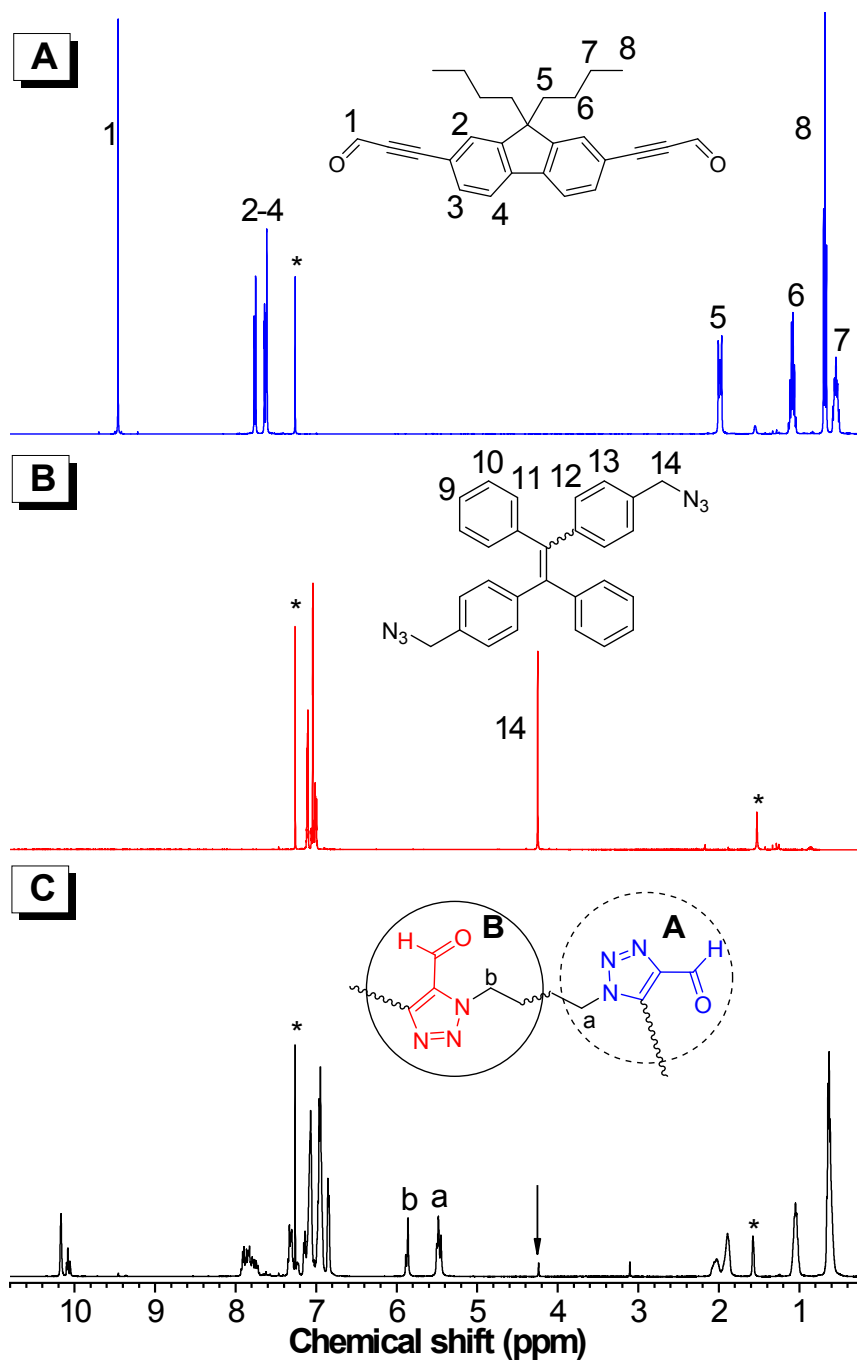

**Fig. S7**  $^1\text{H}$  NMR spectra of **1a** (A), **2b** (B) and **P1a2b** (C) in  $\text{CDCl}_3$ . The solvent peaks are marked with asterisks.

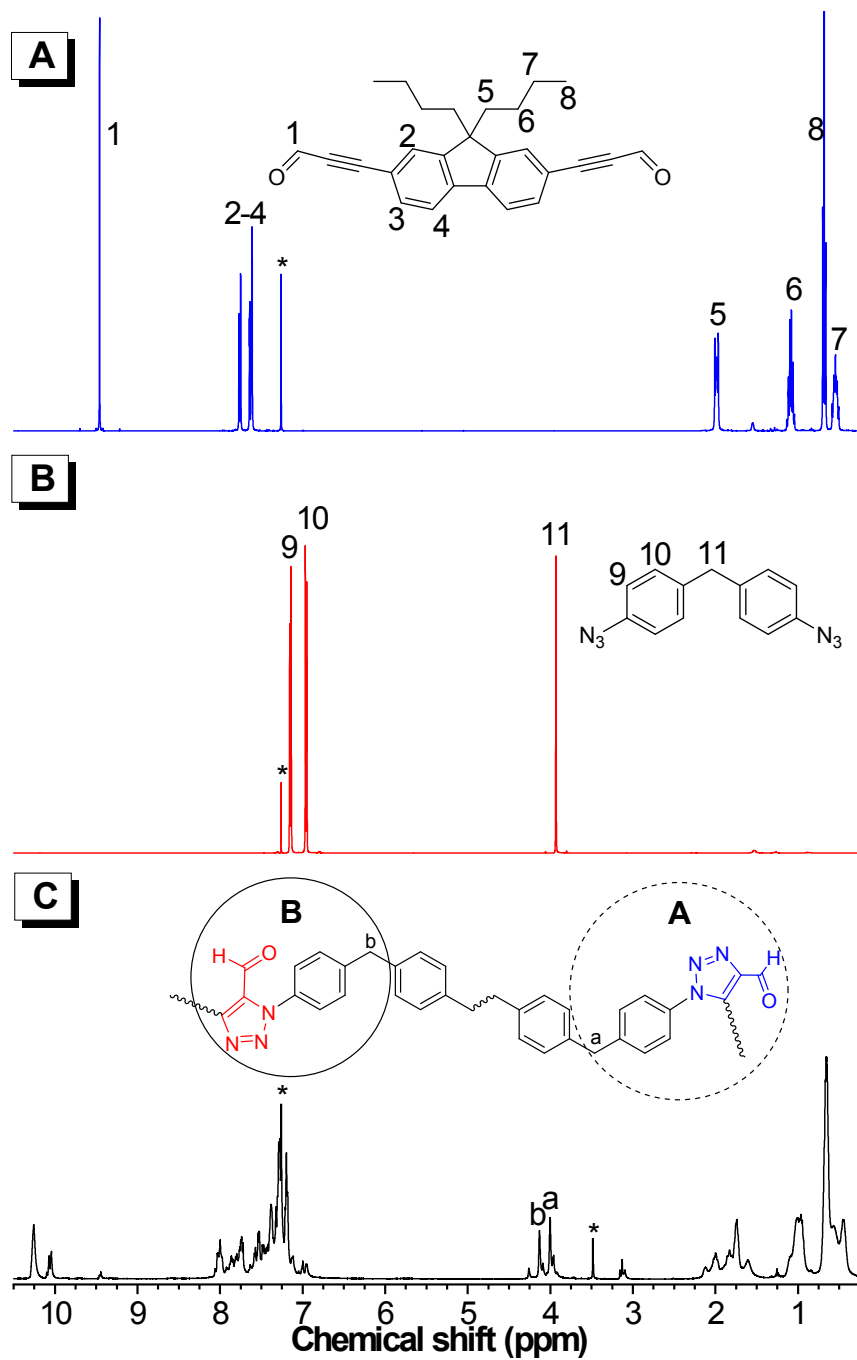

**Fig. S8**  $^1\text{H}$  NMR spectra of **1a** (A), **2c** (B) and **P1a2c** (C) in  $\text{CDCl}_3$ . The solvent peaks are marked with asterisks.



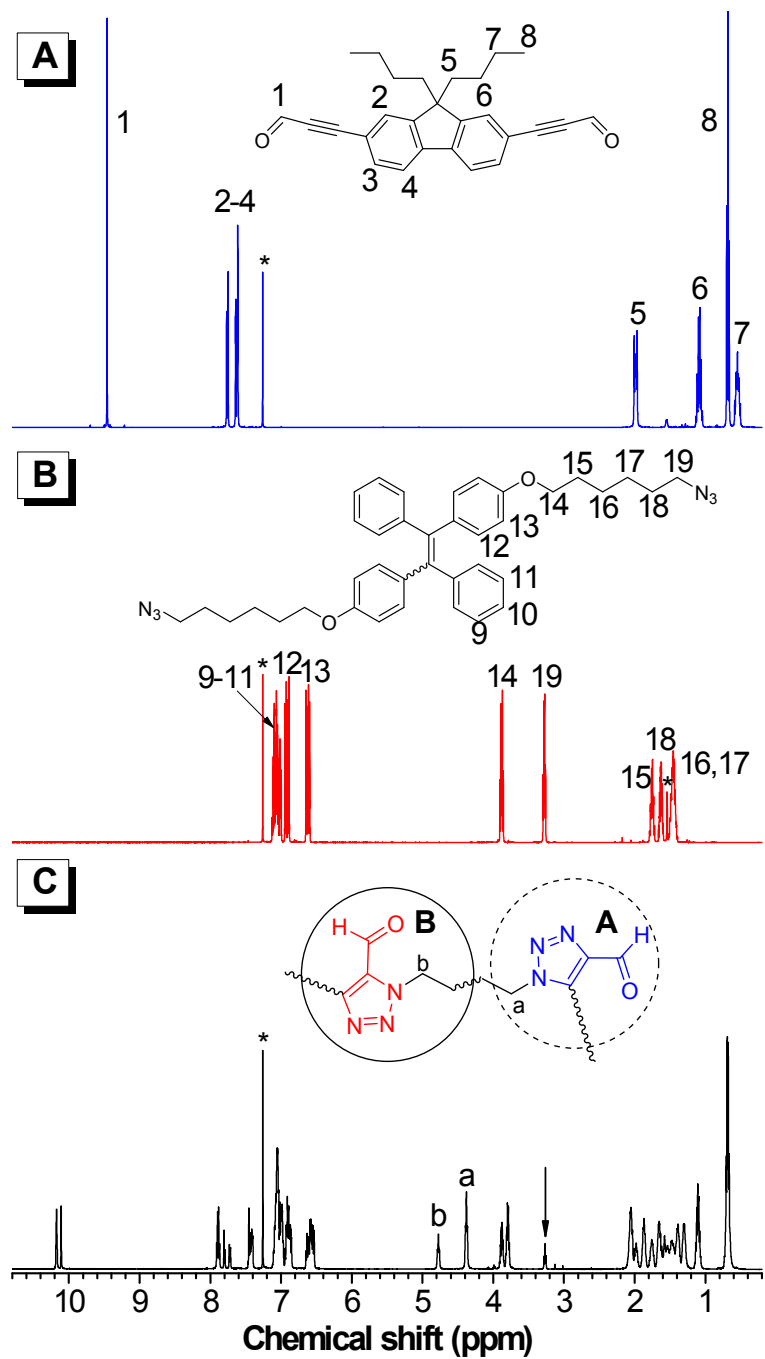

**Fig. S9**  $^1\text{H}$  NMR spectra of **1a** (A), **2d** (B) and **P1a2d** (C) in  $\text{CDCl}_3$ . The solvent peaks are marked with asterisks.

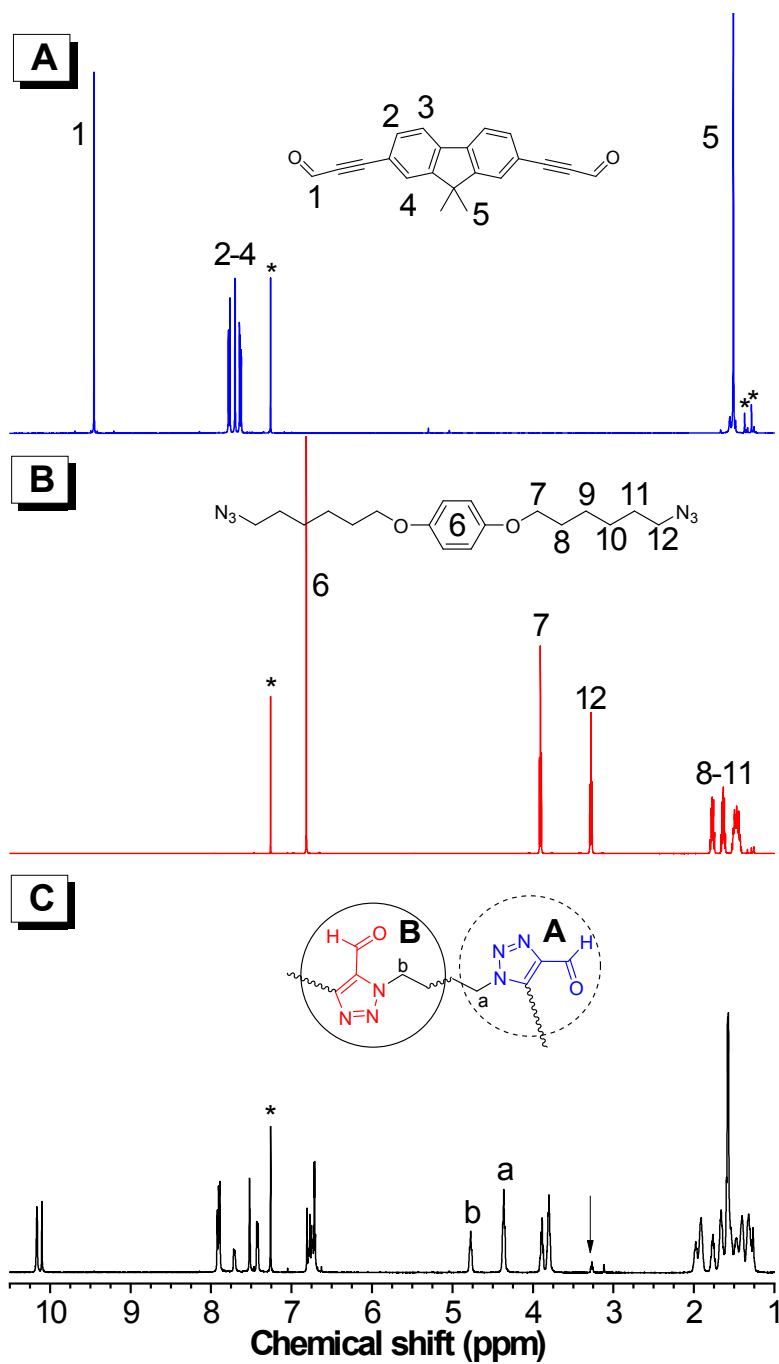

**Fig. S10**  $^1\text{H}$  NMR spectra of **1b** (A), **2a** (B) and **P1b2a** (C) in  $\text{CDCl}_3$ . The solvent peaks are marked with asterisks.

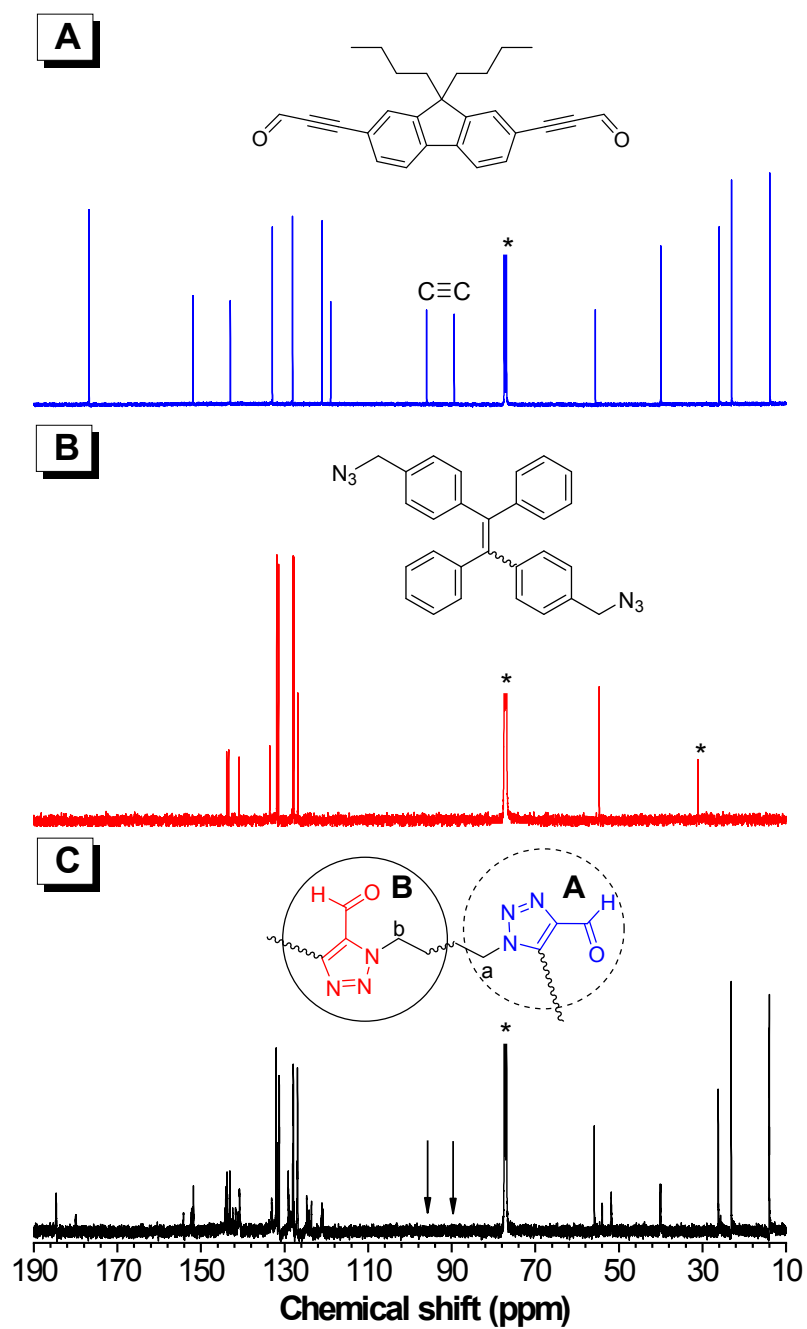

**Fig. S11**  $^{13}\text{C}$  NMR spectra of **1a** (A), **2b** (B) and **P1a2b** (C) in  $\text{CDCl}_3$ . The solvent peaks are marked with asterisks.

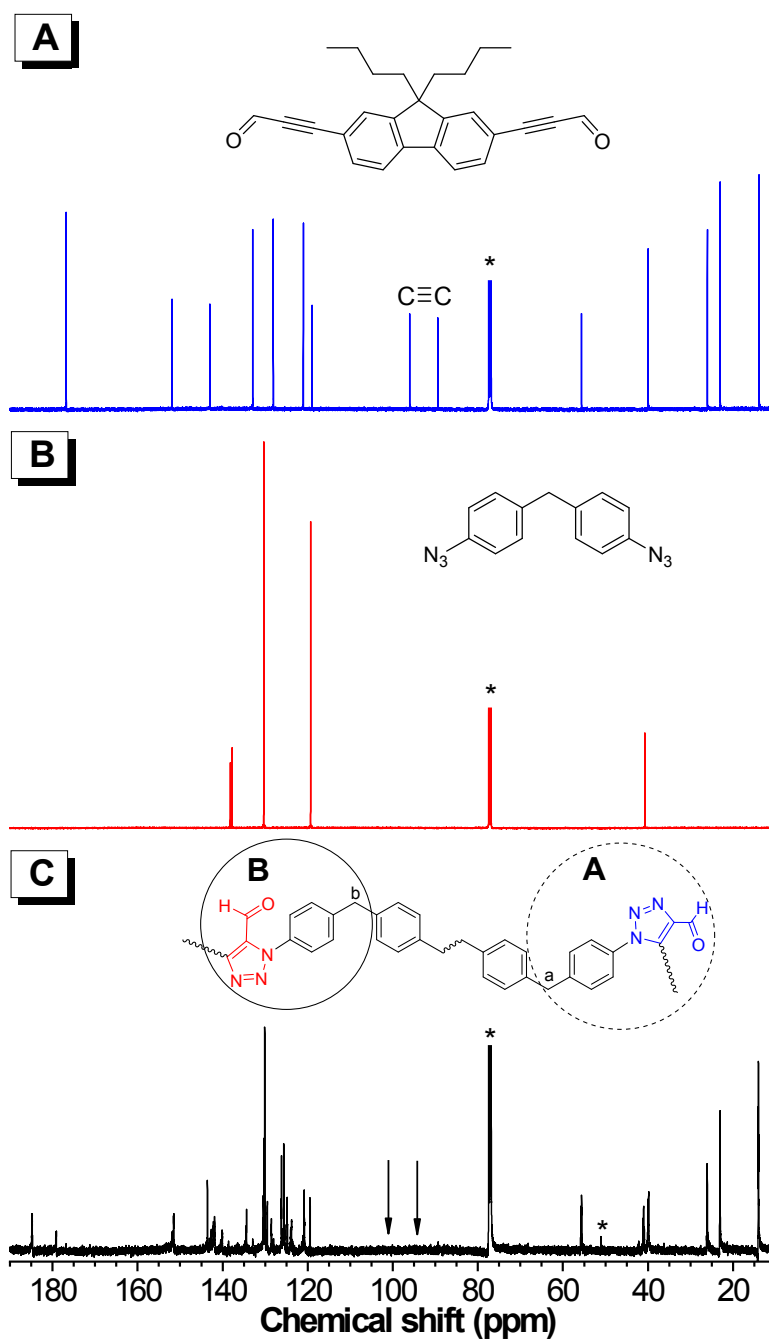

**Fig. S12**  $^{13}\text{C}$  NMR spectra of **1a** (A), **2c** (B) and **P1a2c** (C) in  $\text{CDCl}_3$ . The solvent peaks are marked with asterisks.

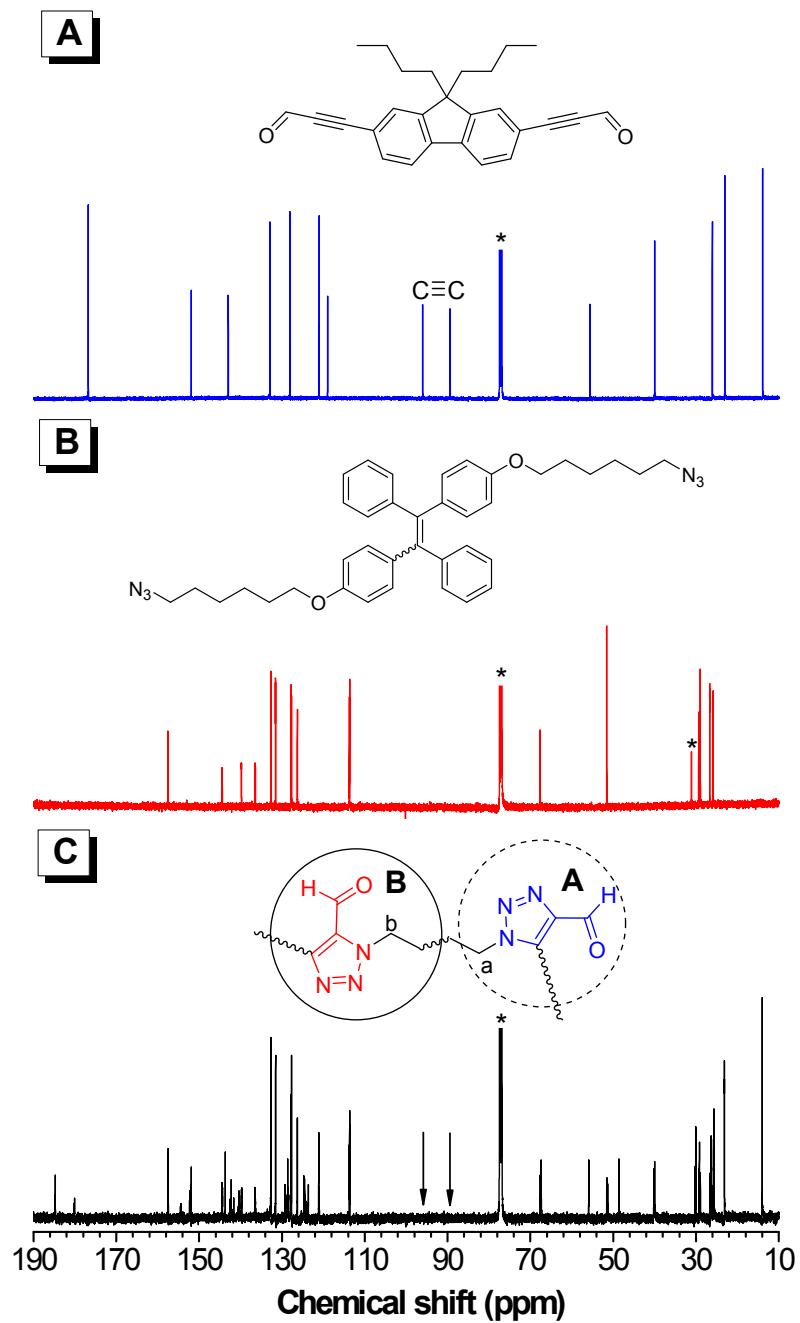

**Fig. S13**  $^{13}\text{C}$  NMR spectra of **1a** (A), **2d** (B) and **P1a2d** (C) in  $\text{CDCl}_3$ . The solvent peaks are marked with asterisks.

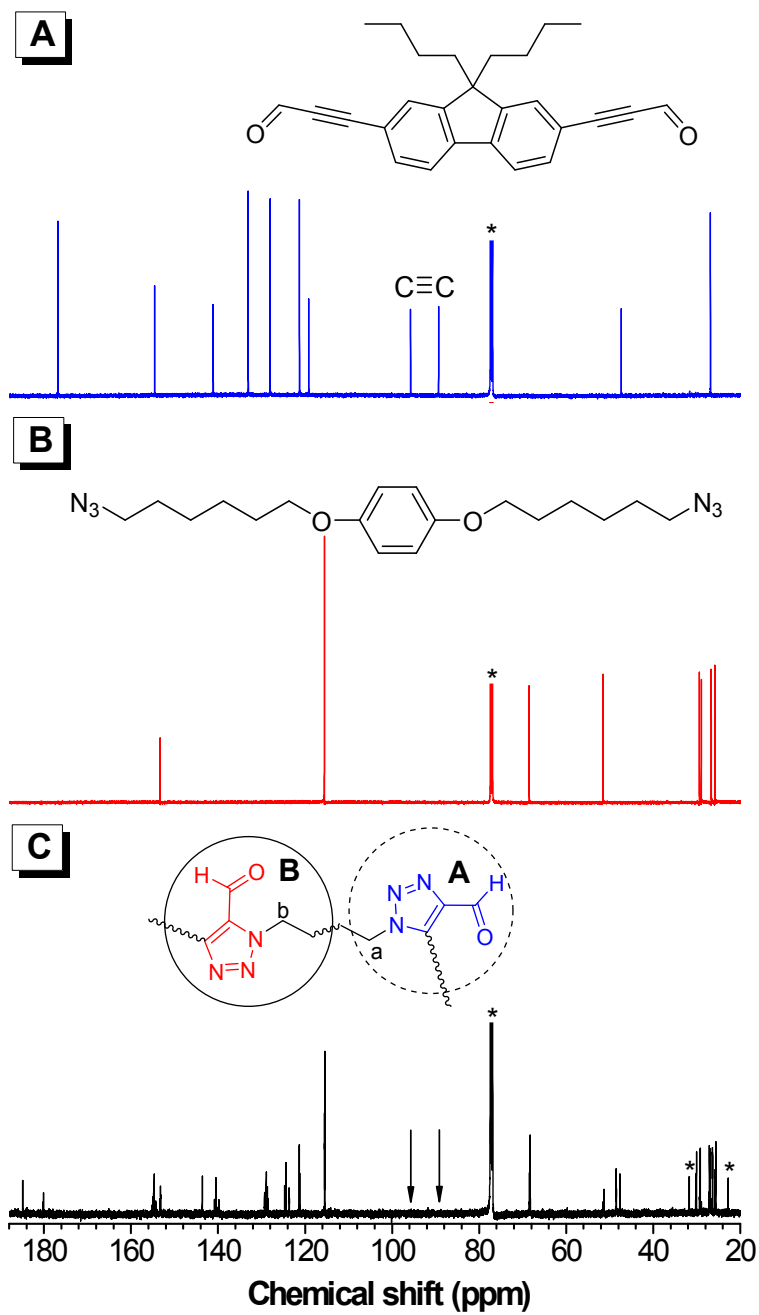

**Fig. S14**  $^{13}\text{C}$  NMR spectra of **1b** (A), **2a** (B) and **P1b2a** (C) in  $\text{CDCl}_3$ . The solvent peaks are marked with asterisks.

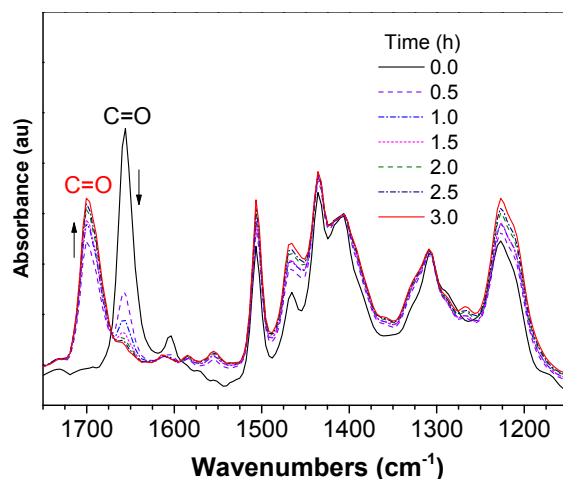

**Fig. S15** The in situ IR spectra of the polymerization solution of **1a** and **2a** at 150 °C within 3 h.

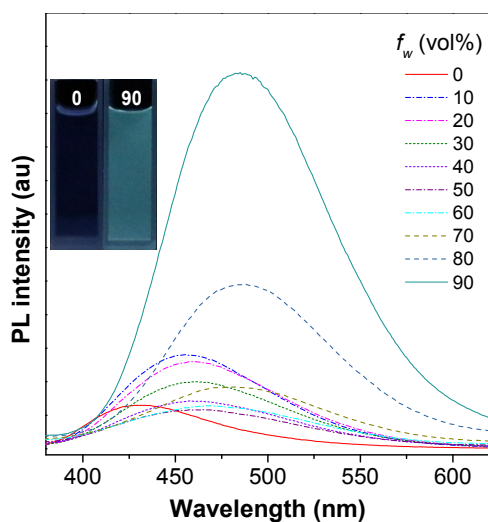

**Fig. S16** PL spectra of **P1a2d** in THF and THF/water mixtures with different water fractions. Concentrations:  $10^{-5}$  M,  $\lambda_{\text{ex}} = 323$  nm. Inset: photograph taken under illumination of hand-held UV lamp.

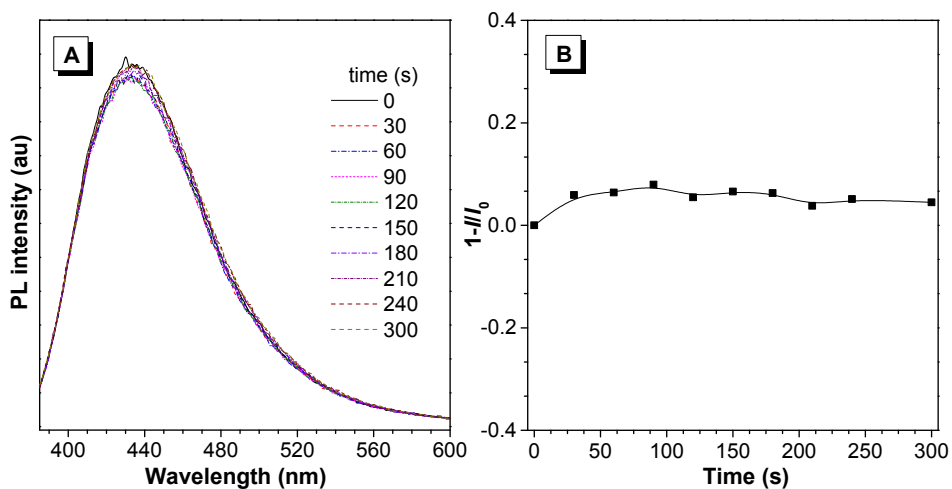

**Fig. S17** Changes of PL spectrum (A) and the plot of normalized changes in PL intensity ( $1-I/I_0$ ) of **P1a2a** treated with hydrazine in THF solutions.

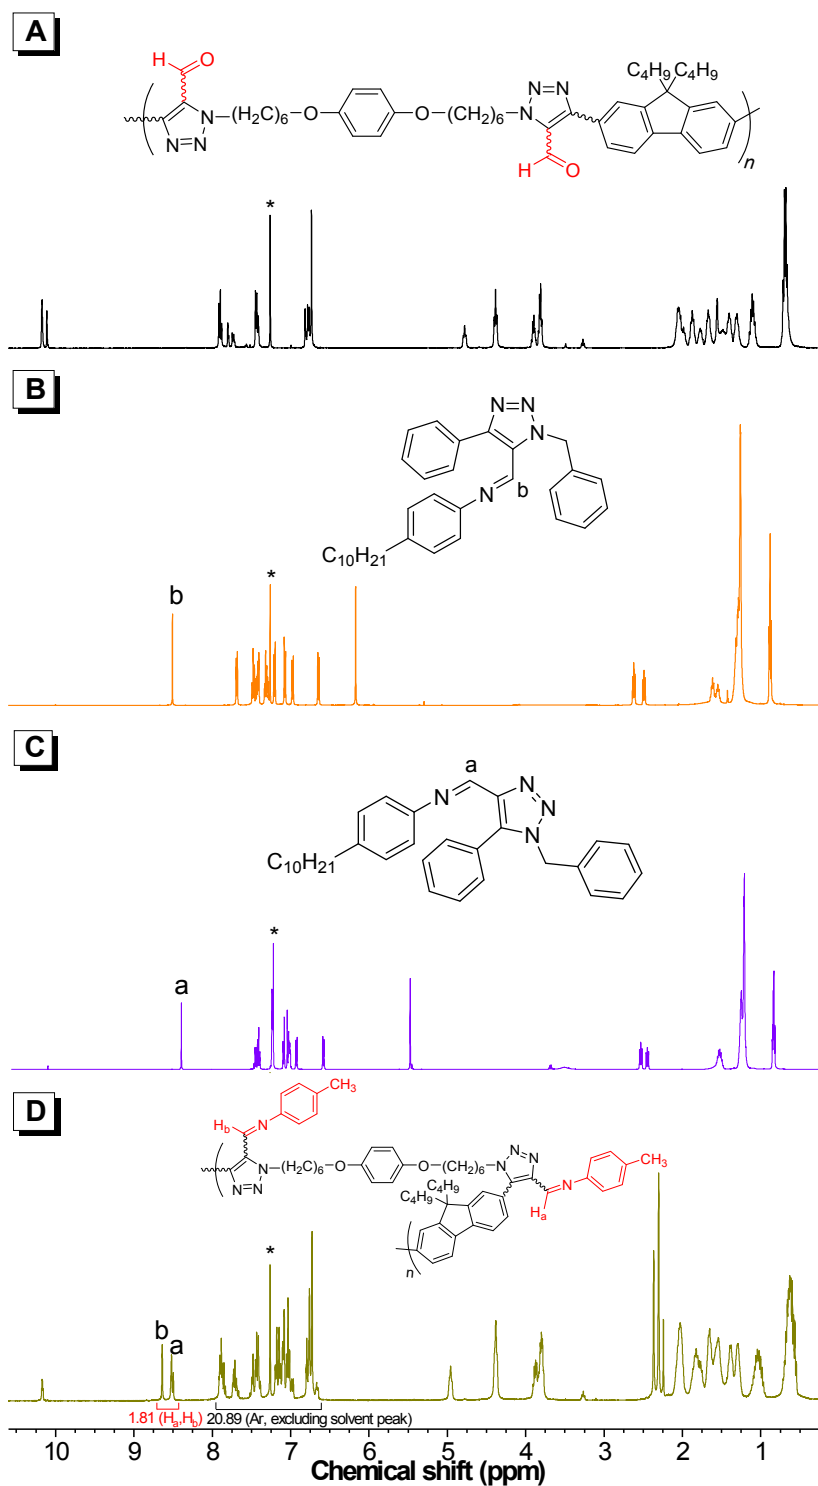

**Fig. S18**  $^1\text{H}$  NMR spectra of **P1a2a** (A), **6-B** (B), **6-A** (C) and **PPM1** (D) in  $\text{CDCl}_3$ . The solvent peaks are marked with asterisks.

The grafting degree of **PPM1** is arranged as  $x$ , then un-reacted part accounts for  $(1-x)$ ,

$$\frac{2x}{18x + 10(1-x)} = \frac{1.81}{20.89}$$

$$x = 0.657$$



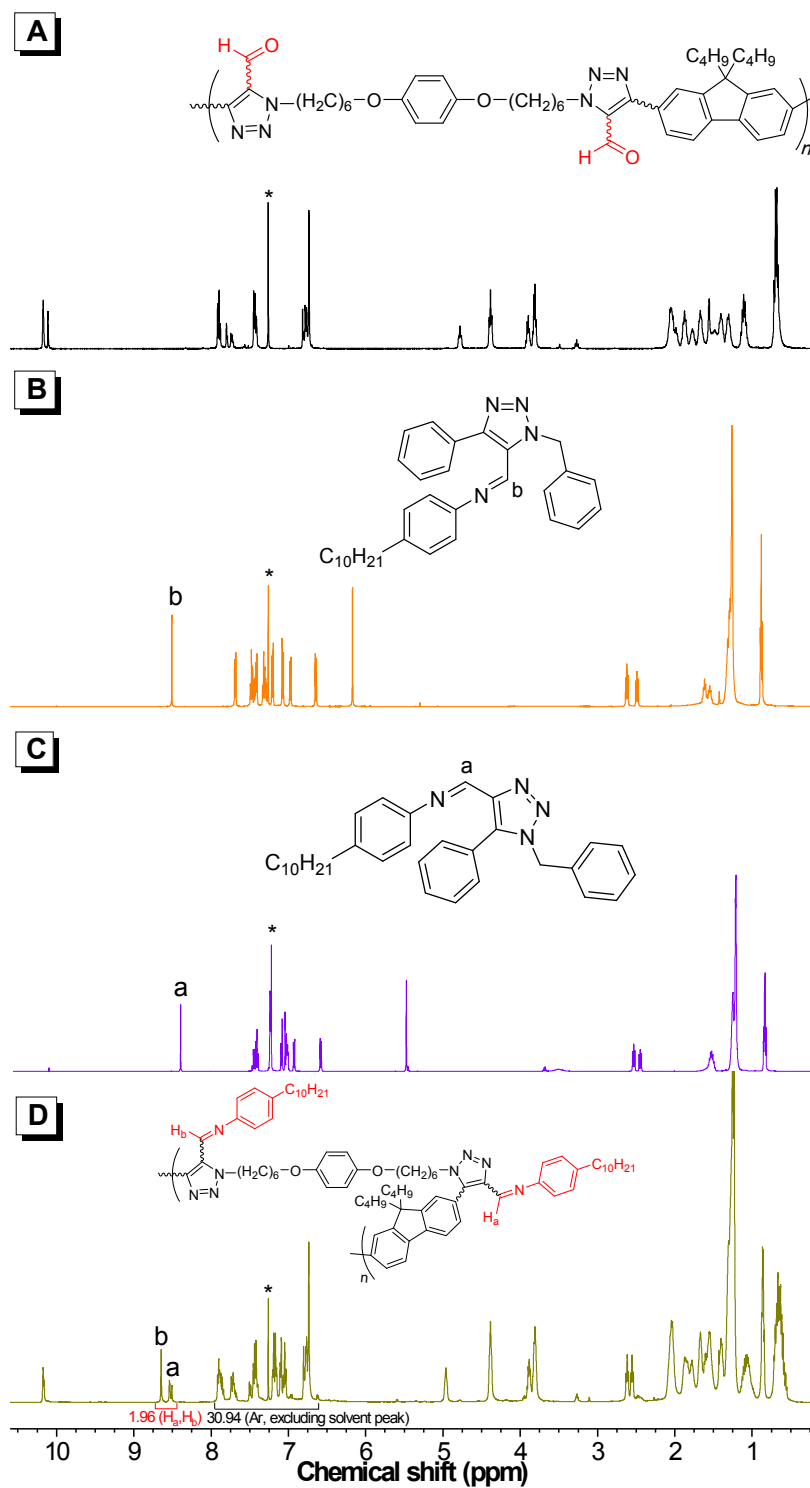

**Fig. S19**  $^1\text{H}$  NMR spectra of **P1a2a** (A), **6-B** (B), **6-A** (C) and **PPM2** (D) in  $\text{CDCl}_3$ . The solvent peaks are marked with asterisks.

The grafting degree of **PPM2** is arranged as  $x$ , then un-reacted part accounts for  $(1-x)$ ,

$$\frac{2x}{18x + 10(1 - x)} = \frac{1.96}{30.94}$$

$$x = 0.424$$

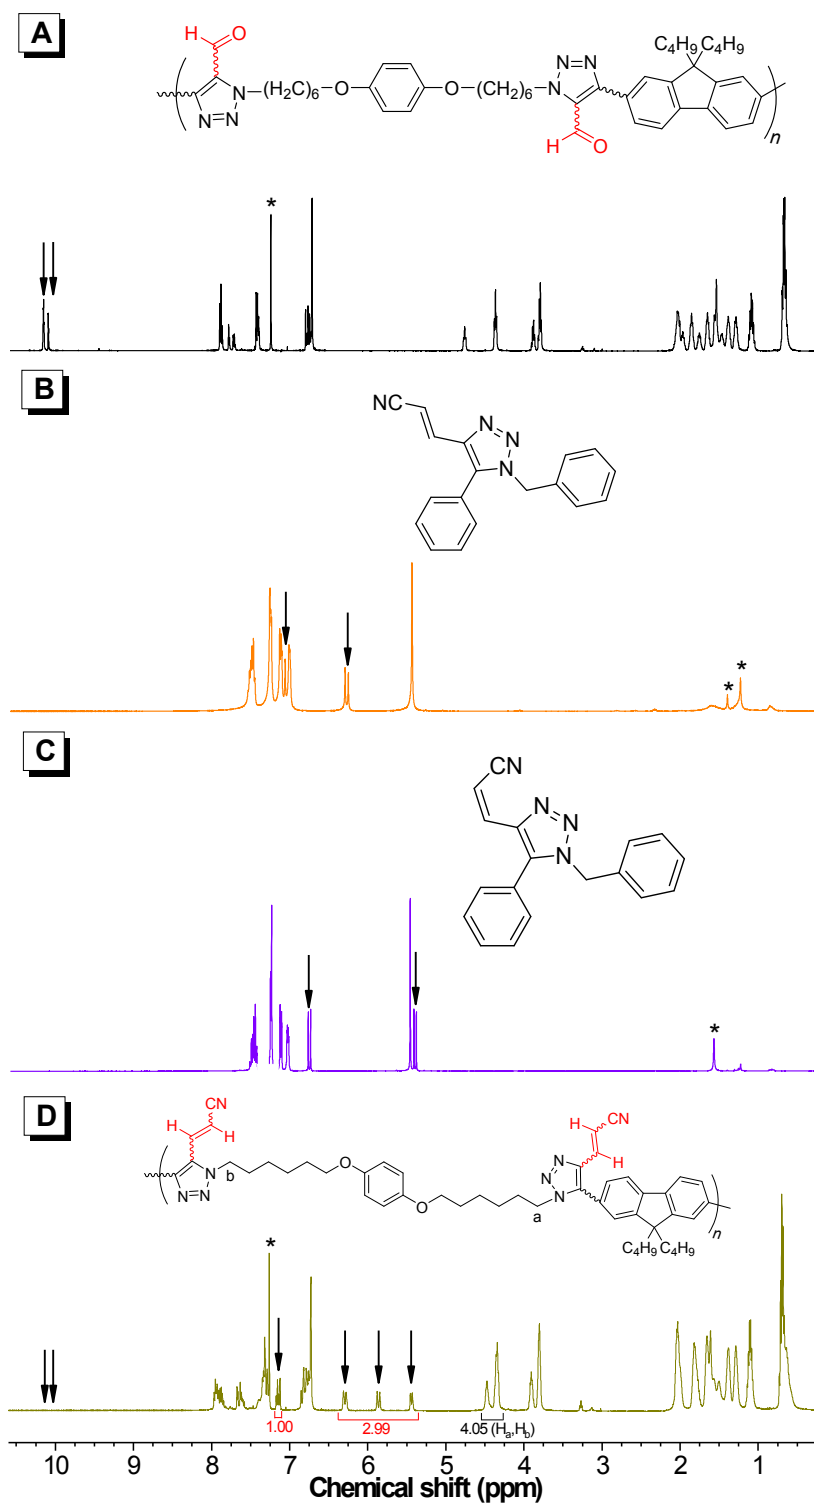

**Fig. S20**  $^1\text{H}$  NMR spectra of **P1a2a** (A), *trans*-**7** (B), *cis*-**7** (C) and **PPM3** (D) in  $\text{CDCl}_3$ . The solvent peaks are marked with asterisks.

The grafting degree of **PPM3** is arranged as  $x$ , then un-reacted part accounts for  $(1-x)$ ,

$$\frac{4x}{4} = \frac{3.99}{4.05}$$

$$x = 0.985$$

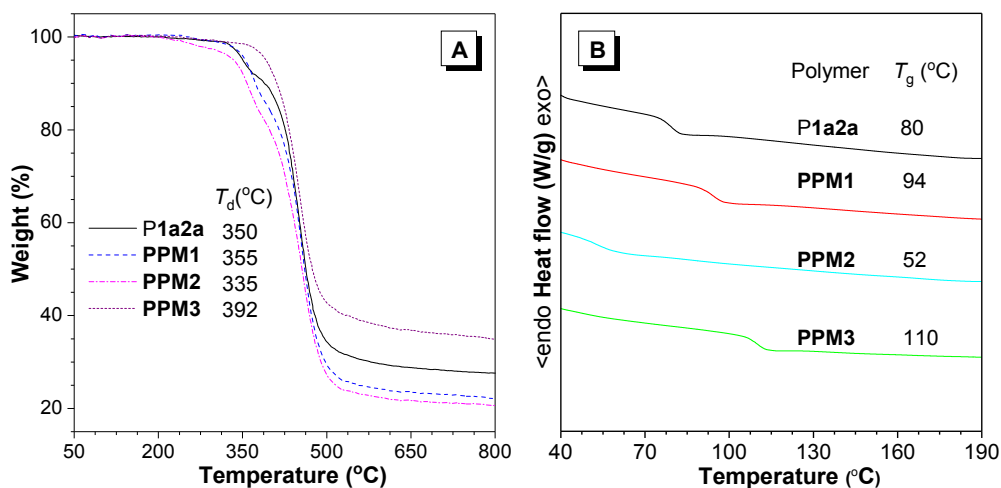

**Fig. S21** TGA (A) and DSC (B) curves of **P1a2a** and its derivatives at a heating rate of  $20\text{ }^{\circ}\text{C min}^{-1}$  under nitrogen.  $T_d$  presents temperature of 5% weight loss.

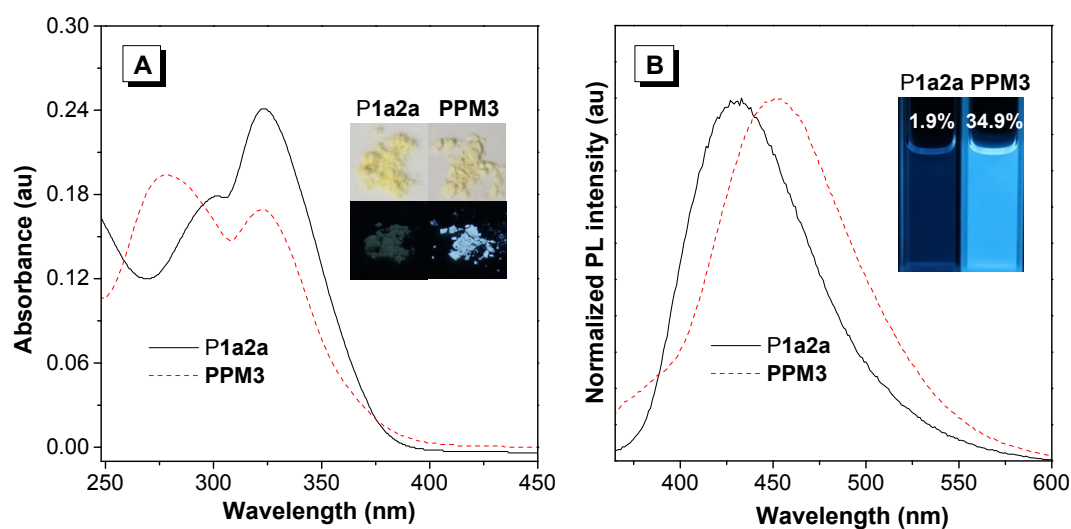

**Fig. S22** UV-vis absorption spectra (A) and PL spectra (B) of **P1a2a** and **PPM3** in THF solutions. Concentrations:  $10^{-5}\text{ M}$ ,  $\lambda_{\text{ex}} = 323\text{ nm}$ . Inset: photographs of **P1a2a** and **PPM3** powders (A) and their THF solutions (B) taken under daylight and UV illumination.

## References

- (1) X. Lang, F. You, X. He, Y. Yu and L. He, *Green Chem.*, 2019, **21**, 509–514.
- (2) J. M. Hoover and S. S. Stahl, *J. Am. Chem. Soc.*, 2011, **133**, 16901–16910.
- (3) Y. Liu, J. Wang, D. Huang, J. Zhang, S. Guo, R. Hu, Z. Zhao, A. Qin and B. Z. Tang, *Polym. Chem.*, 2015, **6**, 5545–5549.
- (4) A. Qin, L. Tang, J. W. Y. Lam, C. K. W. Jim, Y. Yu, H. Zhao, J. Z. Sun and B. Z. Tang, *Adv. Funct. Mater.*, 2009, **19**, 1891–1900.
- (5) Y. Zhao and T. M. Swager, *Eur. J. Org. Chem.*, 2015, **2015**, 4593–4597.
- (6) W. Chi, W. Yuan, J. Du, T. Han, H. Li, Y. Li and B. Z. Tang, *Macromol. Rapid Commun.*, 2018, **39**, 1800604.
- (7) Y. Wang, W. Wang, X. Wang, X. Cheng, A. Qin, J. Z. Sun and B. Z. Tang, *Polym. Chem.*, 2017, **8**, 5546–5553.
- (8) Y. Hu, J. Zhu, K. H. Chan and Y. H. Wong, *Bioorg. Med. Chem.*, 2013, **21**, 547–552.
